# Supplementary material for: Associations between Allergic and Autoimmune Diseases with Autism Spectrum Disorder and Attention-Deficit/Hyperactivity Disorder within Families: A Population-Based Cohort Study
Source: MDPI journal article supplement (doi:10.3390/ijerph19084503), 2022-04-08
Supplement: s1 [file s1]

Supplementary Table S1. Reference ICD9/10 code of allergic and autoimmune disease.

| Allergic disease             | ICD-9 | ICD-10                    |
|------------------------------|-------|---------------------------|
| Asthma                       | 493   | J45                       |
| Allergy rhinitis             | 477   | J30                       |
| Atopic dermatitis            | 691   | L20                       |
| Autoimmune disease           | ICD-9 | ICD-10                    |
| Rheumatoid arthritis         | 714   | M05, M08, M45             |
| Sjogren syndrome             | 710.2 | M35.0                     |
| Psoriasis                    | 696   | L30.5, L40, L41, L42, L44 |
| Systemic lupus erythematosus | 710.0 | M32                       |
| Ankylosing spondylitis       | 720.0 | M45.9                     |

Supplementary Table S2. Full sibling 's ASD, ADHD and immune diseases and allergic diseases.

| Disease                                  | N=14,576    |
|------------------------------------------|-------------|
| Autism spectrum disorder                 | 141 (1.0)   |
| Attention-deficit/hyperactivity disorder | 1270 (8.7)  |
| Any allergic diseases                    | 7905 (54.2) |
| Asthma                                   | 3999 (27.4) |
| Allergy rhinitis                         | 5685 (39.0) |
| Atopic dermatitis                        | 2968 (20.4) |
| Any autoimmune diseases                  | 39 (0.3)    |
| Rheumatoid arthritis                     | 5 (0.003)   |
| Sjogren syndrome                         | 5 (0.003)   |
| Psoriasis                                | 26 (0.2)    |
| Systemic lupus erythematosus             | 4 (0.003)   |
| Ankylosing spondylitis                   | 0 (0.0)     |

Supplementary Table S3. The association between common immune and allergic disorder of half-sibling and individual's ASD and ADHD using familiar aggregation.

|                                                 | OR (95% CI)         | P-value |
|-------------------------------------------------|---------------------|---------|
| <i>Autism spectrum disorder</i>                 |                     |         |
| Any autoimmune diseases                         | 3.26 (0.45-23.81)   | 0.245   |
| Rheumatoid arthritis                            | 0.00 (0.00->99.99)  | 0.981   |
| Sjogren syndrome                                | 4.84 (0.65-35.87)   | 0.123   |
| Psoriasis                                       | 0.00 (0.00->99.99)  | 0.932   |
| Systemic lupus erythematosus                    | 1.48 (1.00-2.17)    | 0.047   |
| Any allergic diseases                           | 1.55 (1.07-2.26)    | 0.021   |
| Asthma                                          | 3.29 (0.45-24.20)   | 0.242   |
| Allergy rhinitis                                | 0.00 (0.00->99.99)  | 0.991   |
| Atopic dermatitis                               | 4.82 (0.65-35.69)   | 0.124   |
| <i>Attention-deficit/hyperactivity disorder</i> |                     |         |
| Any autoimmune diseases                         | 0.00 (0.00 ->99.99) | 0.934   |
| Rheumatoid arthritis                            | 0.00 (0.00->99.99)  | 0.923   |
| Sjogren syndrome                                | 0.00 (0.00->99.99)  | 0.980   |
| Psoriasis                                       | 0.00 (0.00->99.99)  | 0.951   |
| Systemic lupus erythematosus                    | 1.06 (0.94-1.21)    | 0.343   |
| Any allergic diseases                           | 1.16 (1.00-1.35)    | 0.043   |
| Asthma                                          | 0.00 (0.00->99.99)  | 0.987   |
| Allergy rhinitis                                | 0.00 (0.00->99.99)  | 0.932   |
| Atopic dermatitis                               | 0.00 (0.00->99.99)  | 0.950   |
